# Supplementary material for: Disruption of large-scale electrophysiological networks in stroke patients with visuospatial neglect
Source: Netw Neurosci. 2022 Feb 1;6(1):69–89. doi: 10.1162/netn_a_00210 (PMC8959119; doi:10.1162/netn_a_00210)
Supplement: Supplementary file 1 [file netn-06-69-s001.pdf]

## Supplementary Material

|                                     | Mean       | Standard deviation | Range       |
|-------------------------------------|------------|--------------------|-------------|
| Age (years)                         | 59.4       | 11.3               | 32 - 79     |
| Sex (M/F)                           | 13 M / 2 F | -                  | -           |
| Time since Stroke Onset<br>(months) | 7.5        | 5.3                | 1 - 24.5    |
| Hemianopia (%)                      | 27% (4/15) | -                  | -           |
| Left omission errors (%)            | 77%        | 29%                | 13% - 100%, |
| Right omission errors (%)           | 23%        | 23%                | 0%– 67%     |
| Central omission errors<br>(%)      | 54%        | 42%                | 0% - 100%   |
| Total omission errors (%)           | 51%        | 26%                | 6% – 86%    |

***Supplementary Table 1: Summary data of the stroke patient sample (n=15).*** The table shows the group mean, standard deviation and range (i.e. minimum and maximum values) for clinical and behavioral variables.

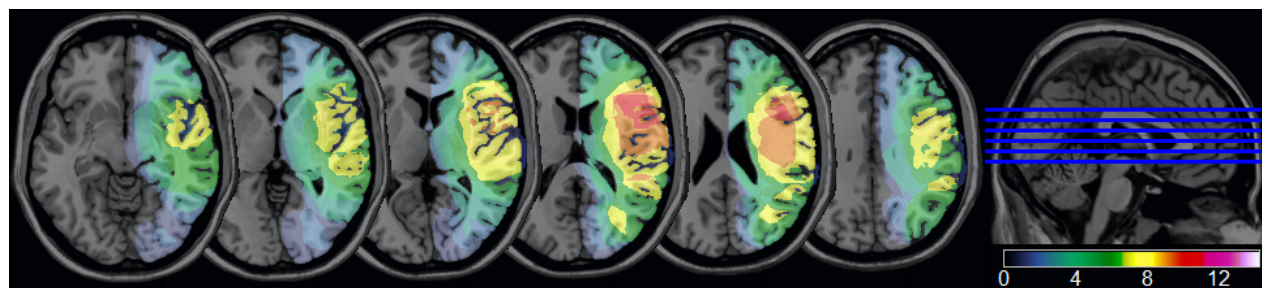

**Supplementary Fig. S1: Average structural MRI lesion maps of the 15 stroke patients with hemineglect.** Colors code for the number of patients with damage to a particular voxel location. Lesions were widely distributed in the right hemisphere, with the strongest overlap in fronto-insular regions (red colour, peak coordinates [x= 42, y= -2, z= 14]), affected in a maximum of 10 patients.

REGRESSION ANALYSIS: *connectivity vs behaviour*

**TOTAL OMISSION ERRORS**

**ALPHA  
8-12 Hz**

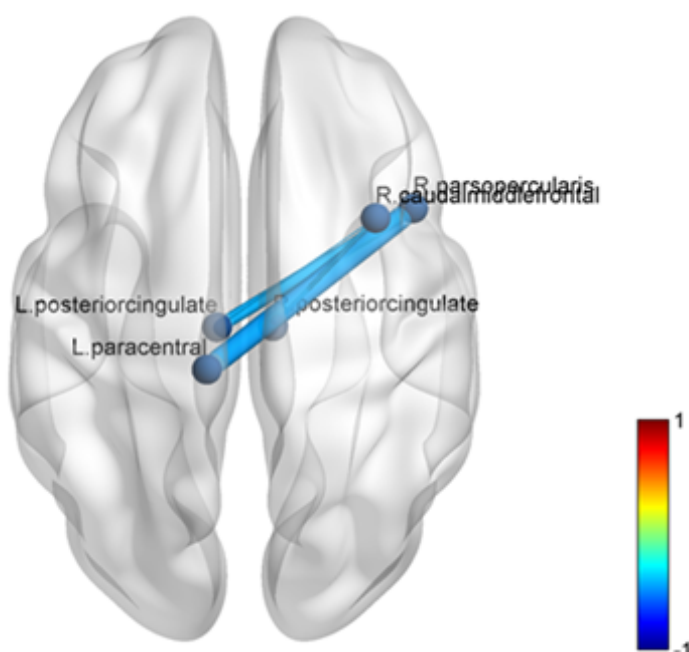

***Supplementary Fig. S2: Alpha (8-12 Hz) connectivity as a function of neglect severity.***

Depicted connections correspond to changes in individual pairwise FNC correlating with the *total* number of left and right omissions during the cancellation task. Red/blue values indicate statistically significant beta coefficients ( $p < 0.05$  Network Based Statistic (NBS) corrected)

REGRESSION ANALYSIS: *connectivity vs behaviour*

**TOTAL OMISSION ERRORS**

**BETA**  
**13-30 Hz**

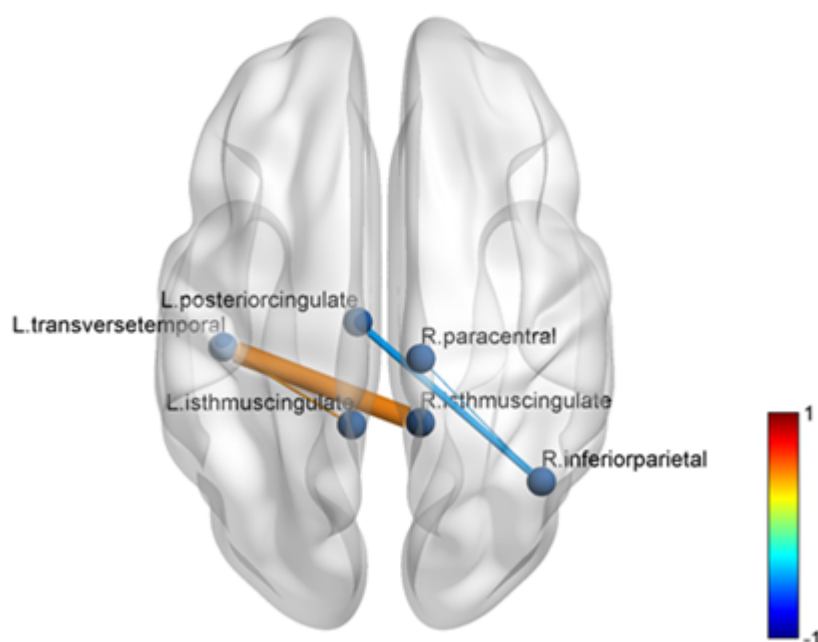

**Supplementary Fig. S3: Beta (13-30 Hz) connectivity as a function of neglect severity.**

Depicted connections correspond to changes in individual pairwise FNC correlating with the *total* number of left and right omissions during the cancellation task. Red/blue values indicate statistically significant beta coefficients ( $p < 0.05$  Network Based Statistic (NBS) corrected)

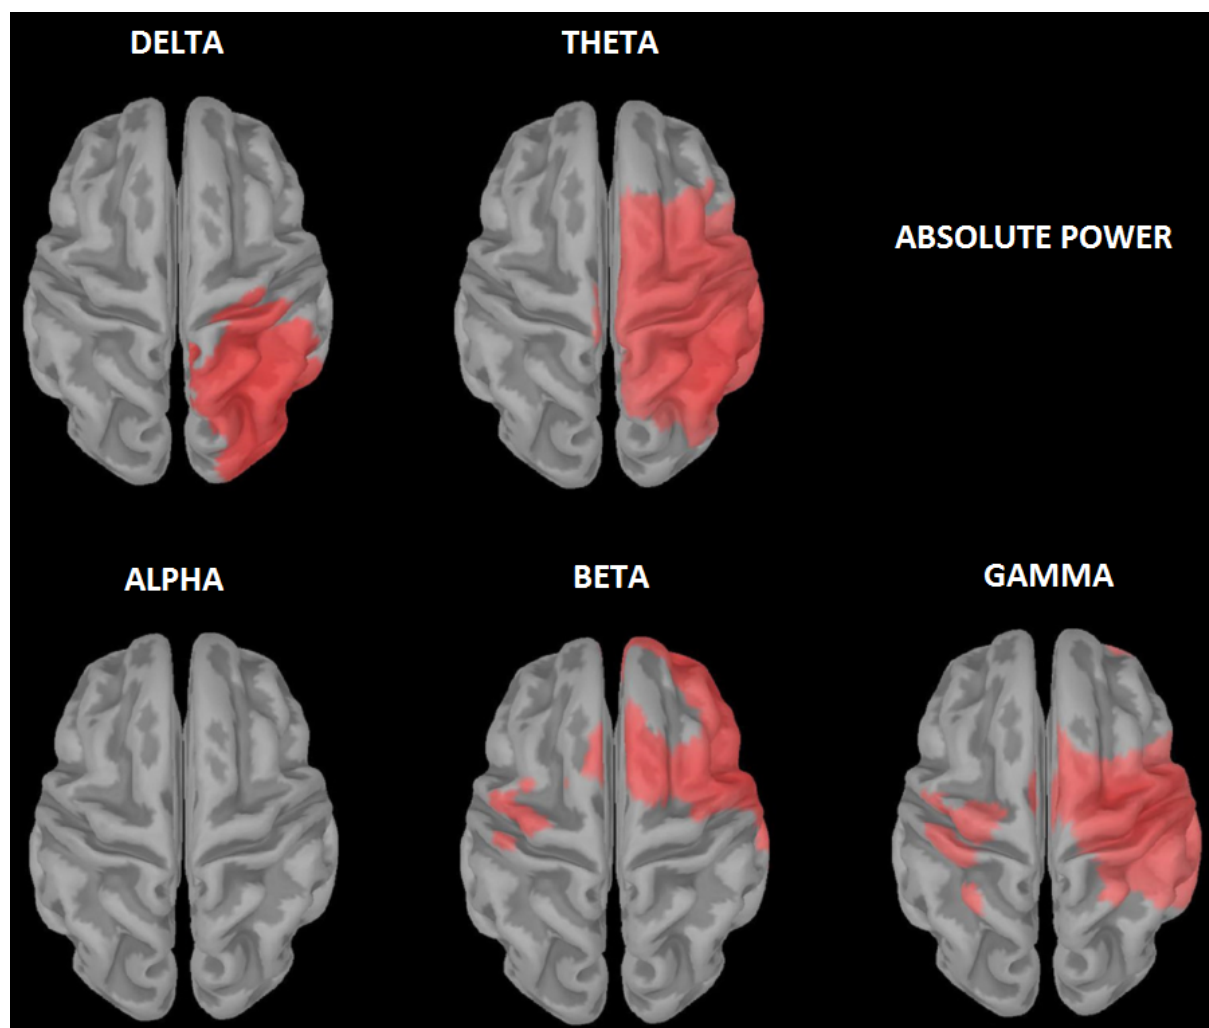

**Supplementary Fig. S4. Absolute spectral power.** T-values of statistical differences in sLORETA relative source-power between hemineglect patients and controls. *Red colour* indicates greater power for patients, while *blue colour* indicates greater power for controls ( $p < 0.05$  FDR corrected).

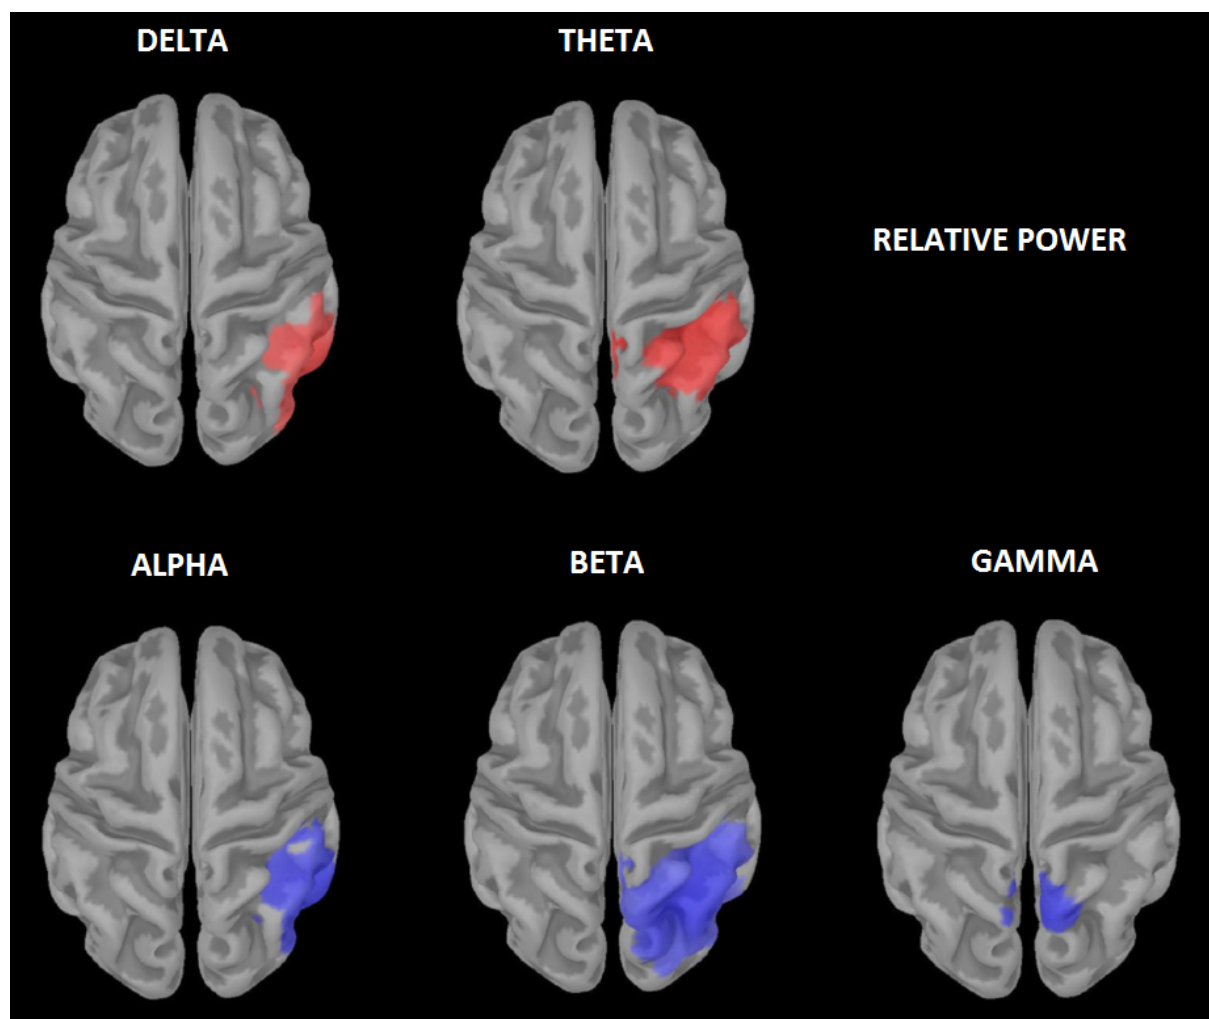

**Supplementary Fig. S5. Relative spectral power.** T-values of statistical differences in sLORETA relative source-power between hemineglect patients and controls. *Red colour* indicates greater power for patients, while *blue colour* indicates greater power for controls ( $p < 0.05$  FDR corrected).

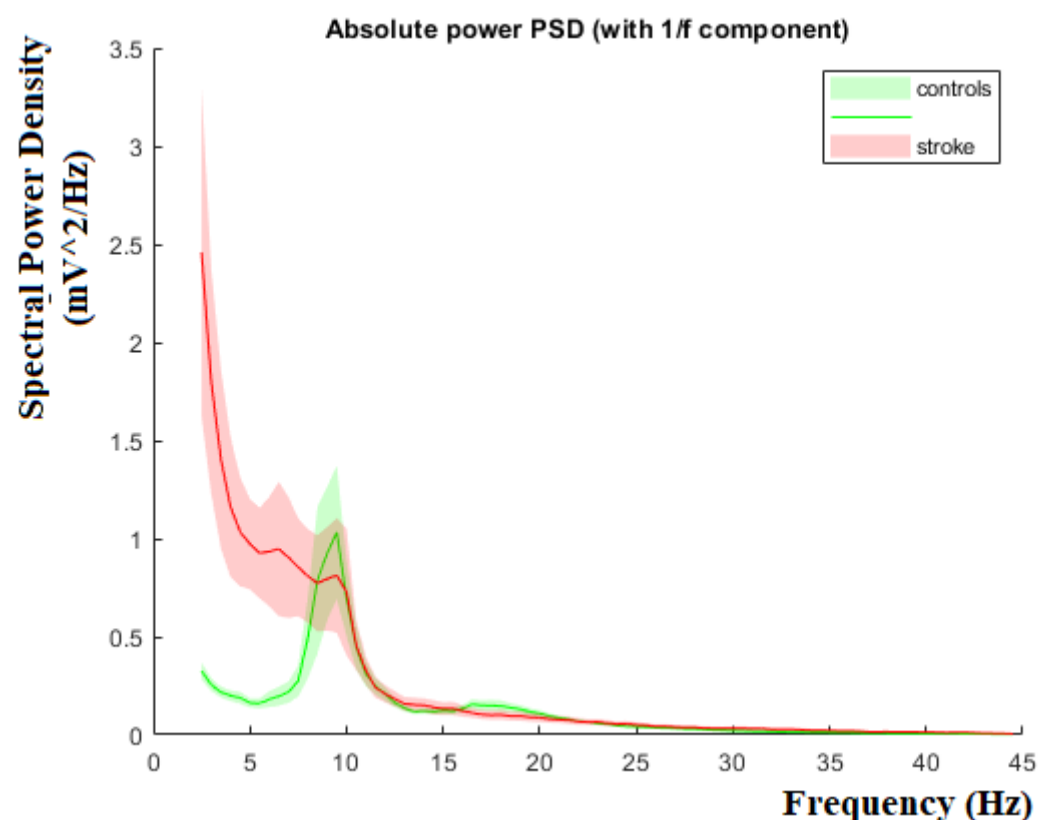

**Supplementary Fig. S6. Absolute Spectral Power Density (PSD) plot of EEG power vs frequency between hemineglect patients and controls, at right posterior parietal cortex (current-source density montage, electrode P4).** *Red colour* indicates absolute power for patients, while *green colour* indicates absolute power for controls.

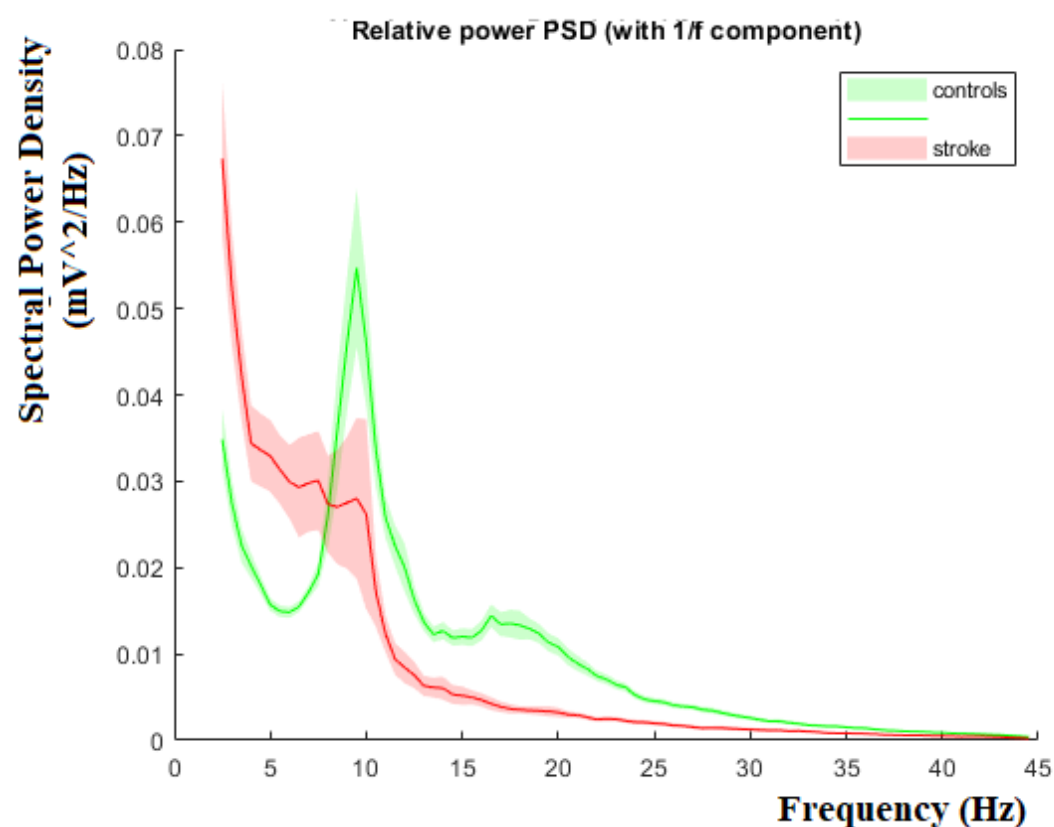

**Supplementary Fig. S7. Relative Spectral Power Density (PSD) plot of EEG power vs frequency between hemineglect patients and controls, at right posterior parietal cortex (current-source density montage, electrode P4). Red colour indicates relative power for patients, while green colour indicates relative power for controls.**

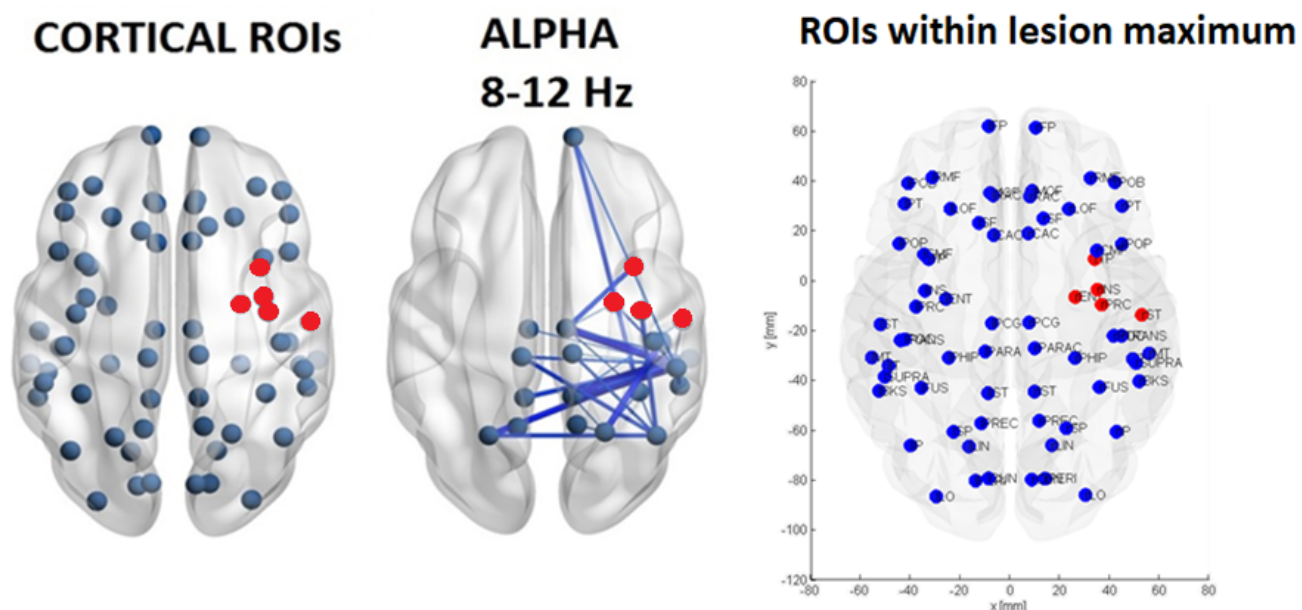

**Supplementary Fig. S8:** Network nodes within locus of maximum lesion with peak coordinates [ $x= 42, y= -2, z= 14$ ]). Affected nodes are depicted in *red colour* in the 3rd panel with MNI coordinates; 1st and 2<sup>nd</sup> panels are from Fig. 1 for comparison. See also Supplementary Figure 3 for structural MRI image of lesions.
